# Supplementary material for: Interpretation of the Ã ← X transition of hydrated protons in aqueous solutions observed in the far-UV region with quantum chemical calculations
Source: Royal Society of Chemistry journal article supplement (doi:10.1039/c7cp01766a), 2017-01-01

## Supplementary Material (ESI) for PCCP

Interpretation of the  $\tilde{A} \leftarrow \tilde{X}$  transition of hydrated proton in aqueous solution observed in far-UV region with quantum chemical calculations

Takeyoshi Goto\*, Krzysztof Bec, and Yukihiro Ozaki

Department of Chemistry, School of Science and Technology, Kwansai Gakuin University, Sanda, Hyogo 669-1337, Japan

\*Corresponding author: Takeyoshi Goto ([ycfjgh@kwansai.ac.jp](mailto:ycfjgh@kwansai.ac.jp))

### Figure S1

Ground (bottom) and excited state (top) NTOs of the first (left) and second shell (right) of  $\text{H}^+(\text{H}_2\text{O})_6$  optimized with the DFT (M062X/6-311++G(d,p)) method.

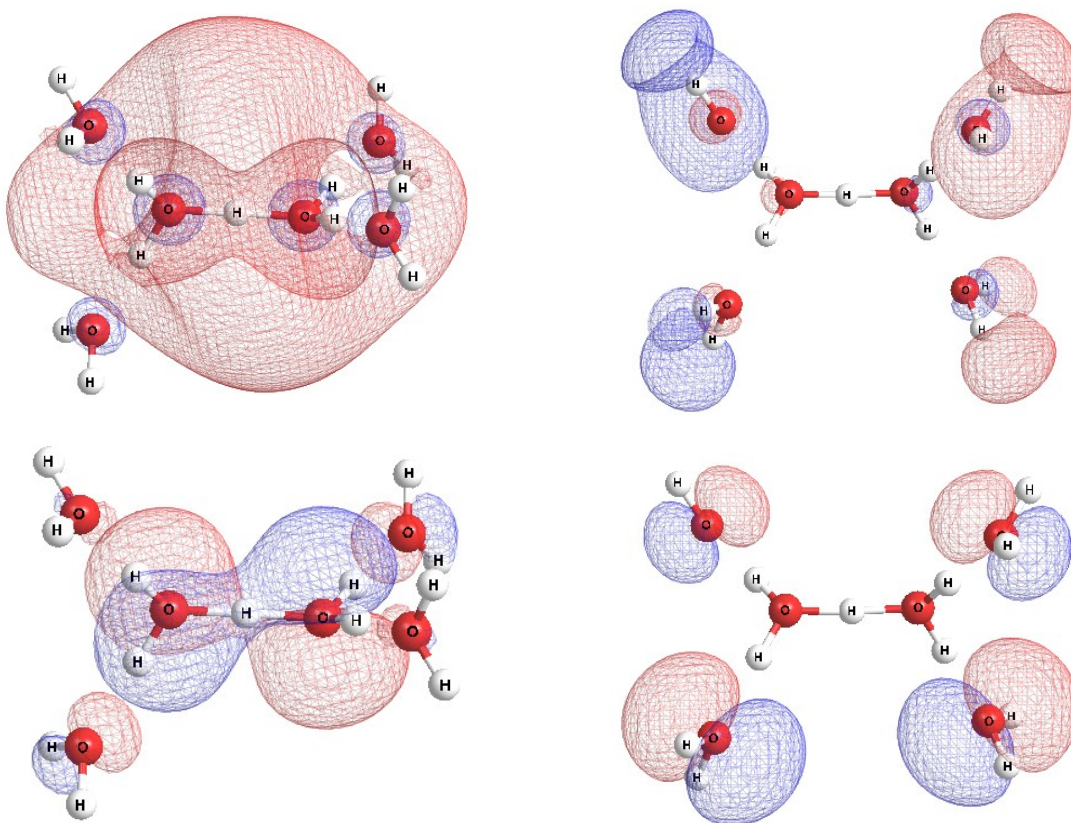

Supplement: c7cp01766a1.pdf [file c7cp01766a1.pdf]
